# Supplementary material
Source: MDPI journal article supplement (https://www.mdpi.com/2071-1050/11/23/6880)
Supplement: s1 [file s1]

## **S1: QUESTIONNAIRE - MALLORCA HOTELS WATER CONSUMPTION**

### **Study reference period: 2011–2015**

#### **I. ESTABLISHMENT CHARACTERISTICS**

A1. Your accommodation establishment is (if you share several, indicate the % of rooms of each type):

Hotel ( )  
Aparthotel ( )  
Hostel/Pension ( )  
Touristic Apartments ( )  
Others (Specify the type \_\_\_\_\_)

A2. How many rooms did your establishment have in?

- 2011:
- 2012:
- 2013:
- 2014:
- 2015:

A3. What was your category (stars/keys) in?

- 2011:
- 2012:
- 2013:
- 2014:
- 2015:

A4. Age of the establishment:

- Opening year: \_\_\_\_\_
- Year of last significant remodeling: \_\_\_\_\_

A5. What type of management does your establishment have?

Ownership management  
Lease contract  
Franchise  
Other (Specify mode \_\_\_\_\_)

A6. Does your establishment belong to a hotel chain?

Si Name of the hotel chain: \_\_\_\_\_  
No

A7. How many months was the establishment open for in?

- 2011:
- 2012:
- 2013:
- 2014:
- 2015:

A8. What was the average monthly occupancy rate of your establishment in the following months and years?

|           | 2011 | 2012 | 2013 | 2014 | 2015 |
|-----------|------|------|------|------|------|
| January   |      |      |      |      |      |
| February  |      |      |      |      |      |
| March     |      |      |      |      |      |
| April     |      |      |      |      |      |
| May       |      |      |      |      |      |
| June      |      |      |      |      |      |
| July      |      |      |      |      |      |
| August    |      |      |      |      |      |
| September |      |      |      |      |      |
| October   |      |      |      |      |      |
| November  |      |      |      |      |      |
| December  |      |      |      |      |      |

A9. Indicate the average daily income (ADR) of your establishment in:

- 2011:
- 2012:
- 2013:
- 2014:
- 2015:

A10. What was the percentage (%) of tourists that you had in the period of maximum activity, according to the occupation regime used? Columns should equal 100 %.

|                   | 2011        | 2012        | 2013        | 2014        | 2015        |
|-------------------|-------------|-------------|-------------|-------------|-------------|
| Accommodation     |             |             |             |             |             |
| Bed and breakfast |             |             |             |             |             |
| Half board        |             |             |             |             |             |
| Full board        |             |             |             |             |             |
| All inclusive     |             |             |             |             |             |
| <b>Total</b>      | <b>100%</b> | <b>100%</b> | <b>100%</b> | <b>100%</b> | <b>100%</b> |

## II. QUESTIONS ABOUT WATER CONSUMPTION

B1. What services does your establishment include?:

- Spa service
- Outdoor swimming pool
- Indoor heated swimming pool
- Golf Course
- Own laundry service

B2. What percentage of your rooms include? (indicate the % of rooms that include it) The total should equal 100 %.

- Bathtub only: \_\_\_\_\_
- Shower only: \_\_\_\_\_
- Bathtub and shower: \_\_\_\_\_

B3. From the following list of water saving measures, which have been introduced in your establishment and at what time (month and year)?

| YES | Water saving measure                       | Month and year |
|-----|--------------------------------------------|----------------|
|     | Low-flow fittings                          |                |
|     | Infrared taps                              |                |
|     | Low-flush toilets                          |                |
|     | Efficient devices in kitchens              |                |
|     | Installation of submeters by zones         |                |
|     | Reuse of gray water for irrigation         |                |
|     | Collection and use of rainwater            |                |
|     | Intelligent irrigation systems             |                |
|     | Vegetation with lower water requirements   |                |
|     | Reduction of water pressure                |                |
|     | Leak detection and control of water losses |                |
|     | Others                                     |                |

B4. What were the reasons for the introduction of the previous water saving measures? (assign percentages according to their importance). The column should equal 100 %.

|                                               | % significance |
|-----------------------------------------------|----------------|
| Cost reduction                                |                |
| Customer loyalty                              |                |
| Improvement of the image of the establishment |                |
| Environmental awareness                       |                |
| By tour operators requirements                |                |
| By chain requirements                         |                |
| By legal requirements                         |                |
| Other (please specify)                        |                |
| <b>Total</b>                                  | <b>100 %</b>   |

B5. What is the irrigated area of your garden (in square meters)? \_\_\_\_\_

B6. What is the garden's irrigation system??:

- Drip
- Spray
- With hose
- Other (Specify system \_\_\_\_\_)

B7. What type of water is used to irrigate the garden?:

- From the municipal supply network
- From natural well
- From rainwater deposit
- Treated waste
- Other (Specify type \_\_\_\_\_)

B8. What is the surface area of the Spa (in square meters)? \_\_\_\_\_

B9. What is the surface area of the pools (in square meters)? \_\_\_\_\_

B10. Does your pool incorporate some water saving system? \_\_\_\_\_  
If yes: Which one? \_\_\_\_\_

B11. How many times do you empty and refill the pool per year? \_\_\_\_\_

B12. What was your consumption of freshwater through the municipal water supply network during the following years (in cubic meters)?

- 2011: \_\_\_\_\_
- 2012: \_\_\_\_\_
- 2013: \_\_\_\_\_
- 2014: \_\_\_\_\_
- 2015: \_\_\_\_\_

B13. What was your consumption of treated wastewater during the following years (in cubic meters)?

- 2011: \_\_\_\_\_
- 2012: \_\_\_\_\_
- 2013: \_\_\_\_\_
- 2014: \_\_\_\_\_
- 2015: \_\_\_\_\_

B14. What was the cost of the annual supply of freshwater through the municipal water supply network (in euros)?

- 2011: \_\_\_\_\_
- 2012: \_\_\_\_\_
- 2013: \_\_\_\_\_
- 2014: \_\_\_\_\_
- 2015: \_\_\_\_\_

**THANK YOU VERY MUCH FOR YOUR COLLABORATION**
